# Supplementary material for: Differential Expression and Function of SVIP in Breast Cancer Cell Lines and In Silico Analysis of Its Expression and Prognostic Potential in Human Breast Cancer
Source: MDPI journal article supplement (doi:10.3390/cells12101362), 2023-05-11
Supplement: s1 [file s1]

Figure S1

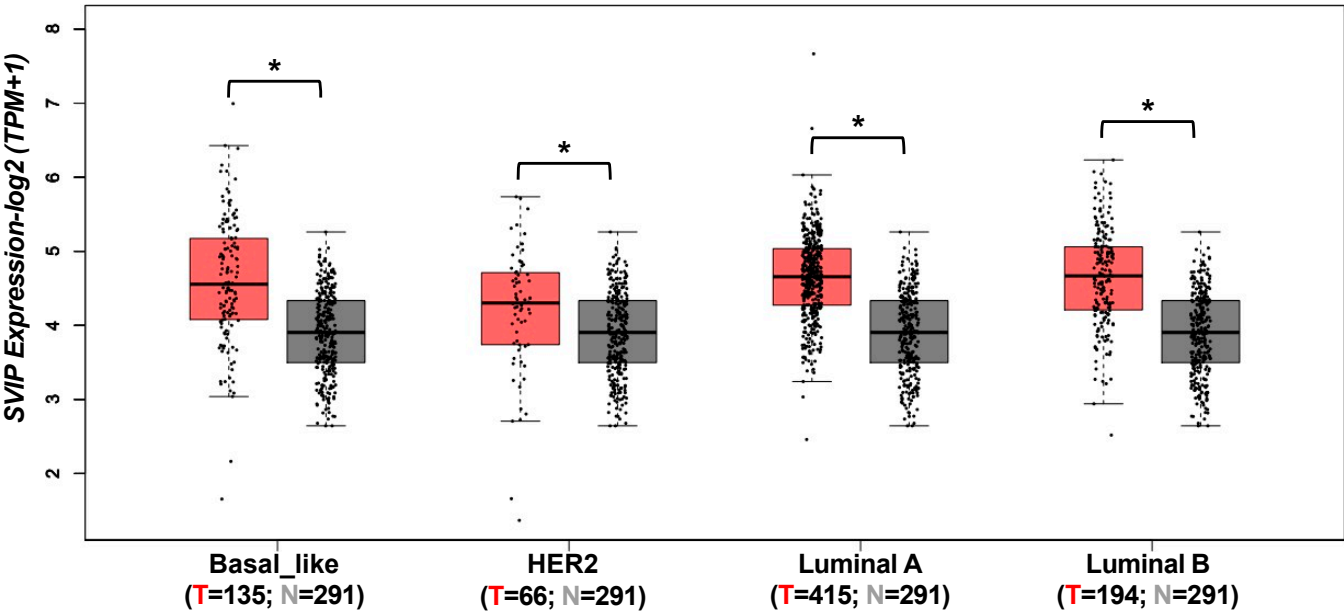

Figure S2

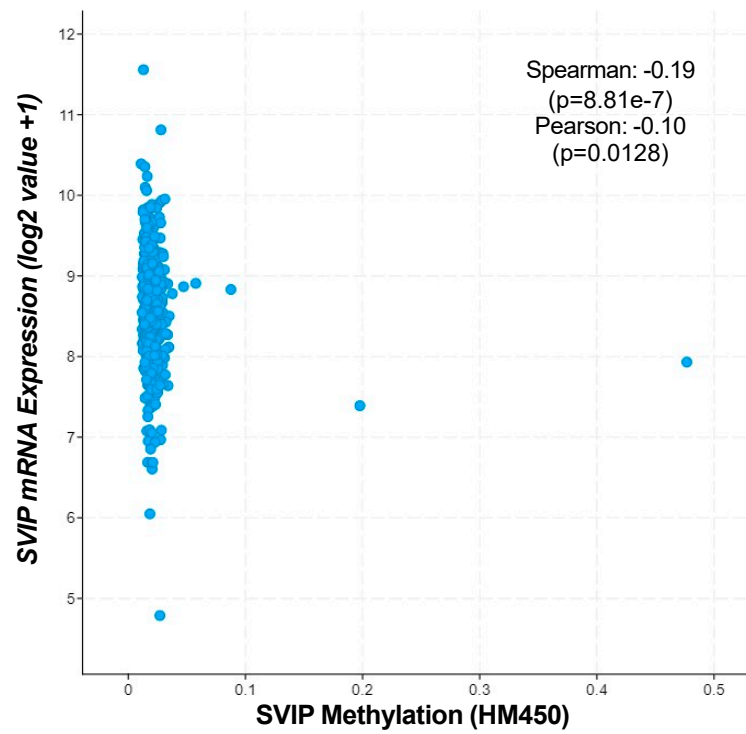

Figure S3

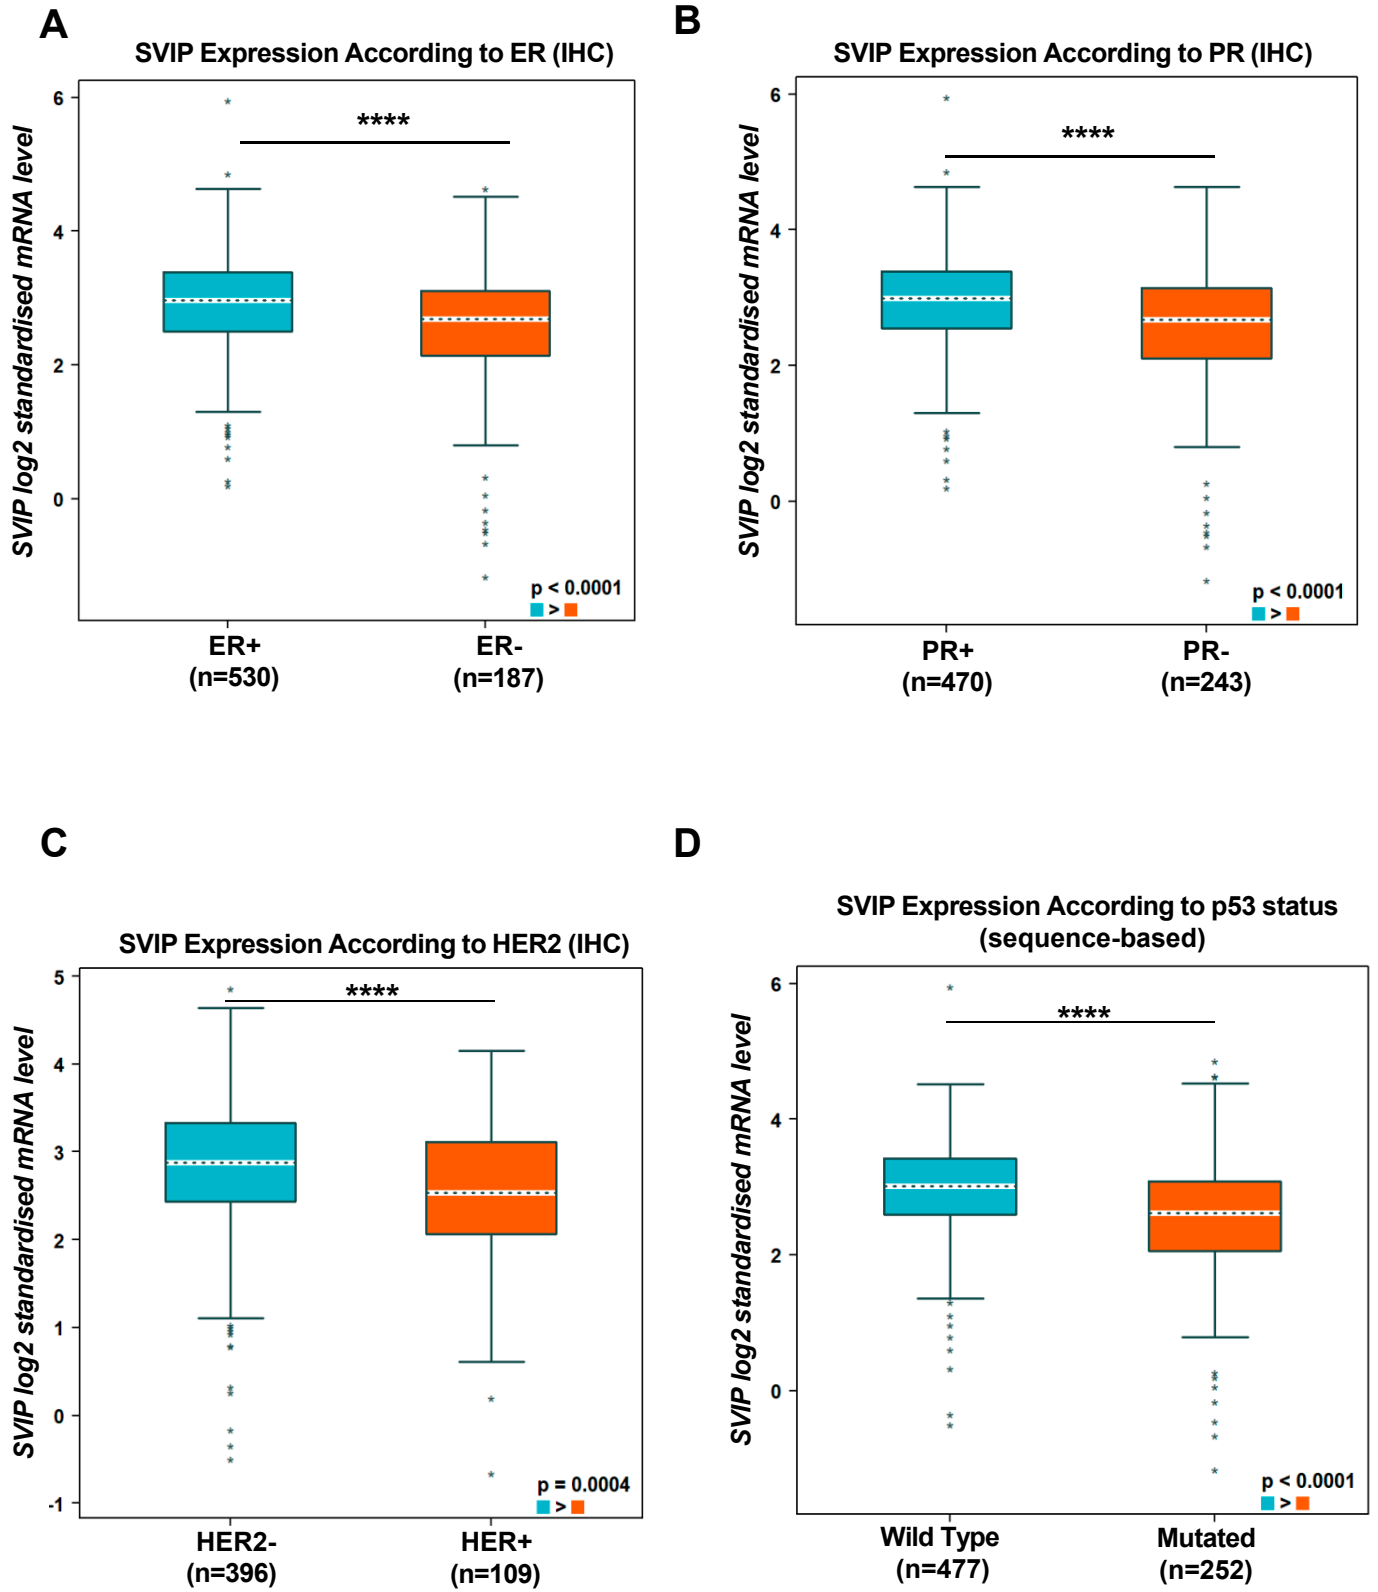

Figure S4

A

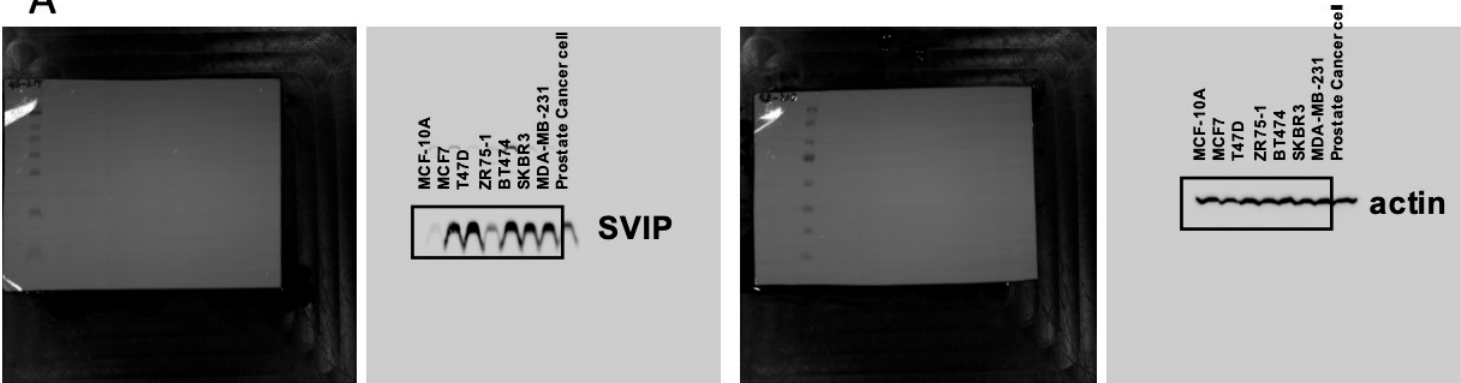

B

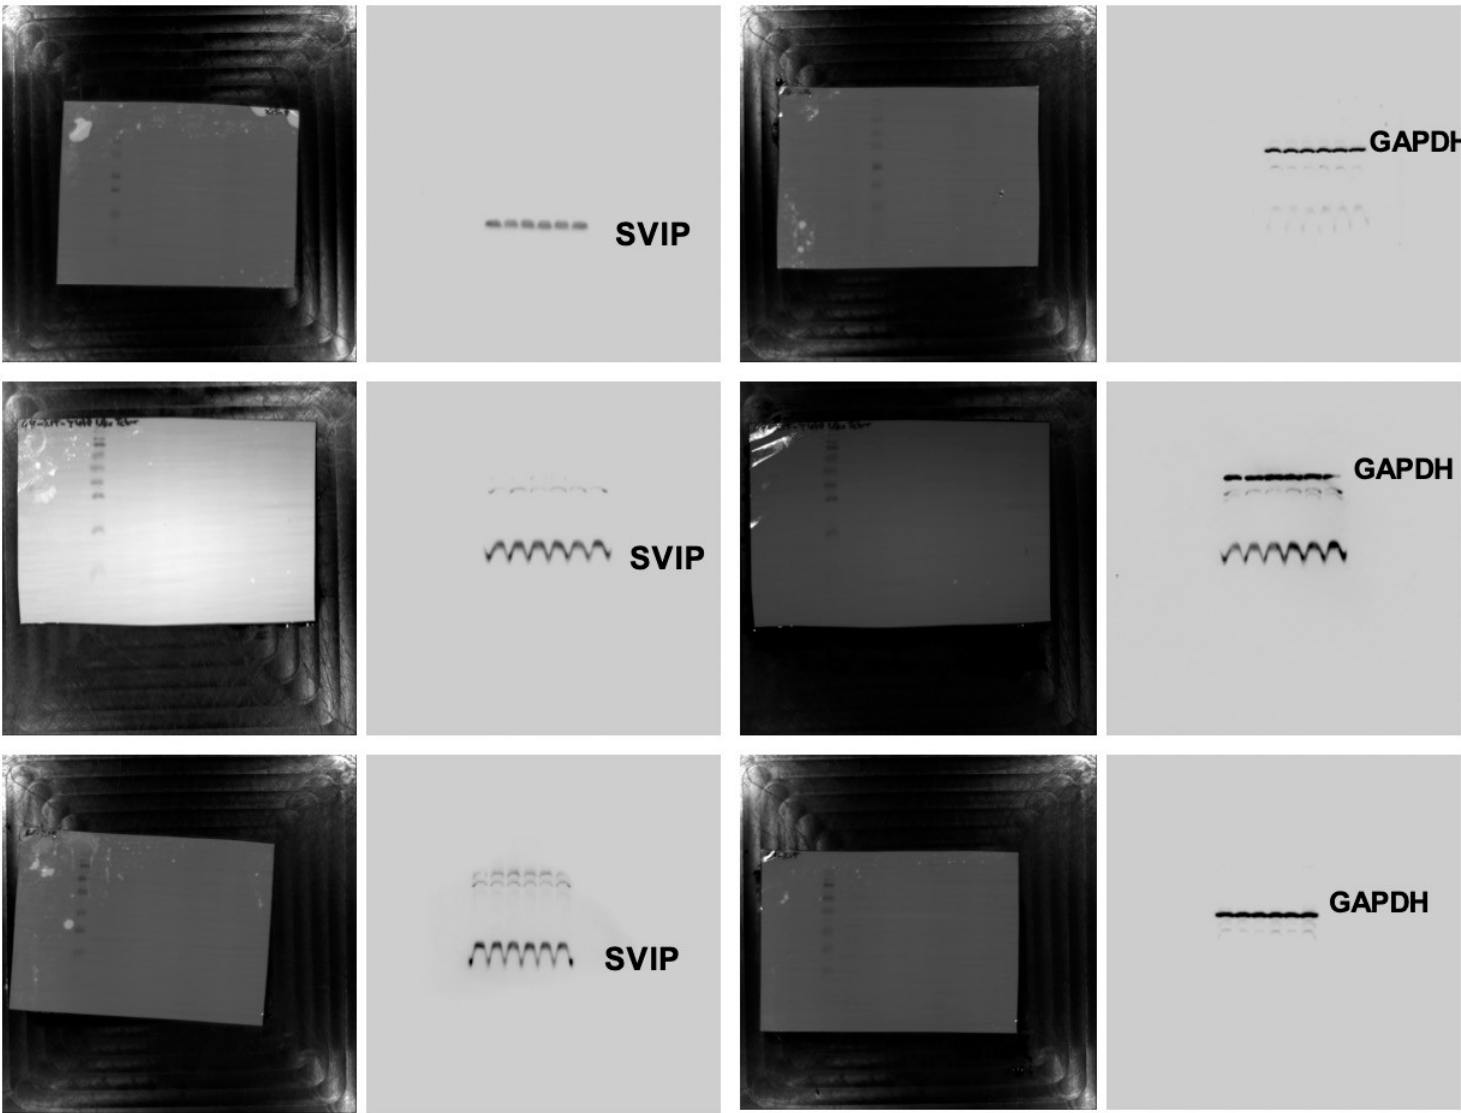

C

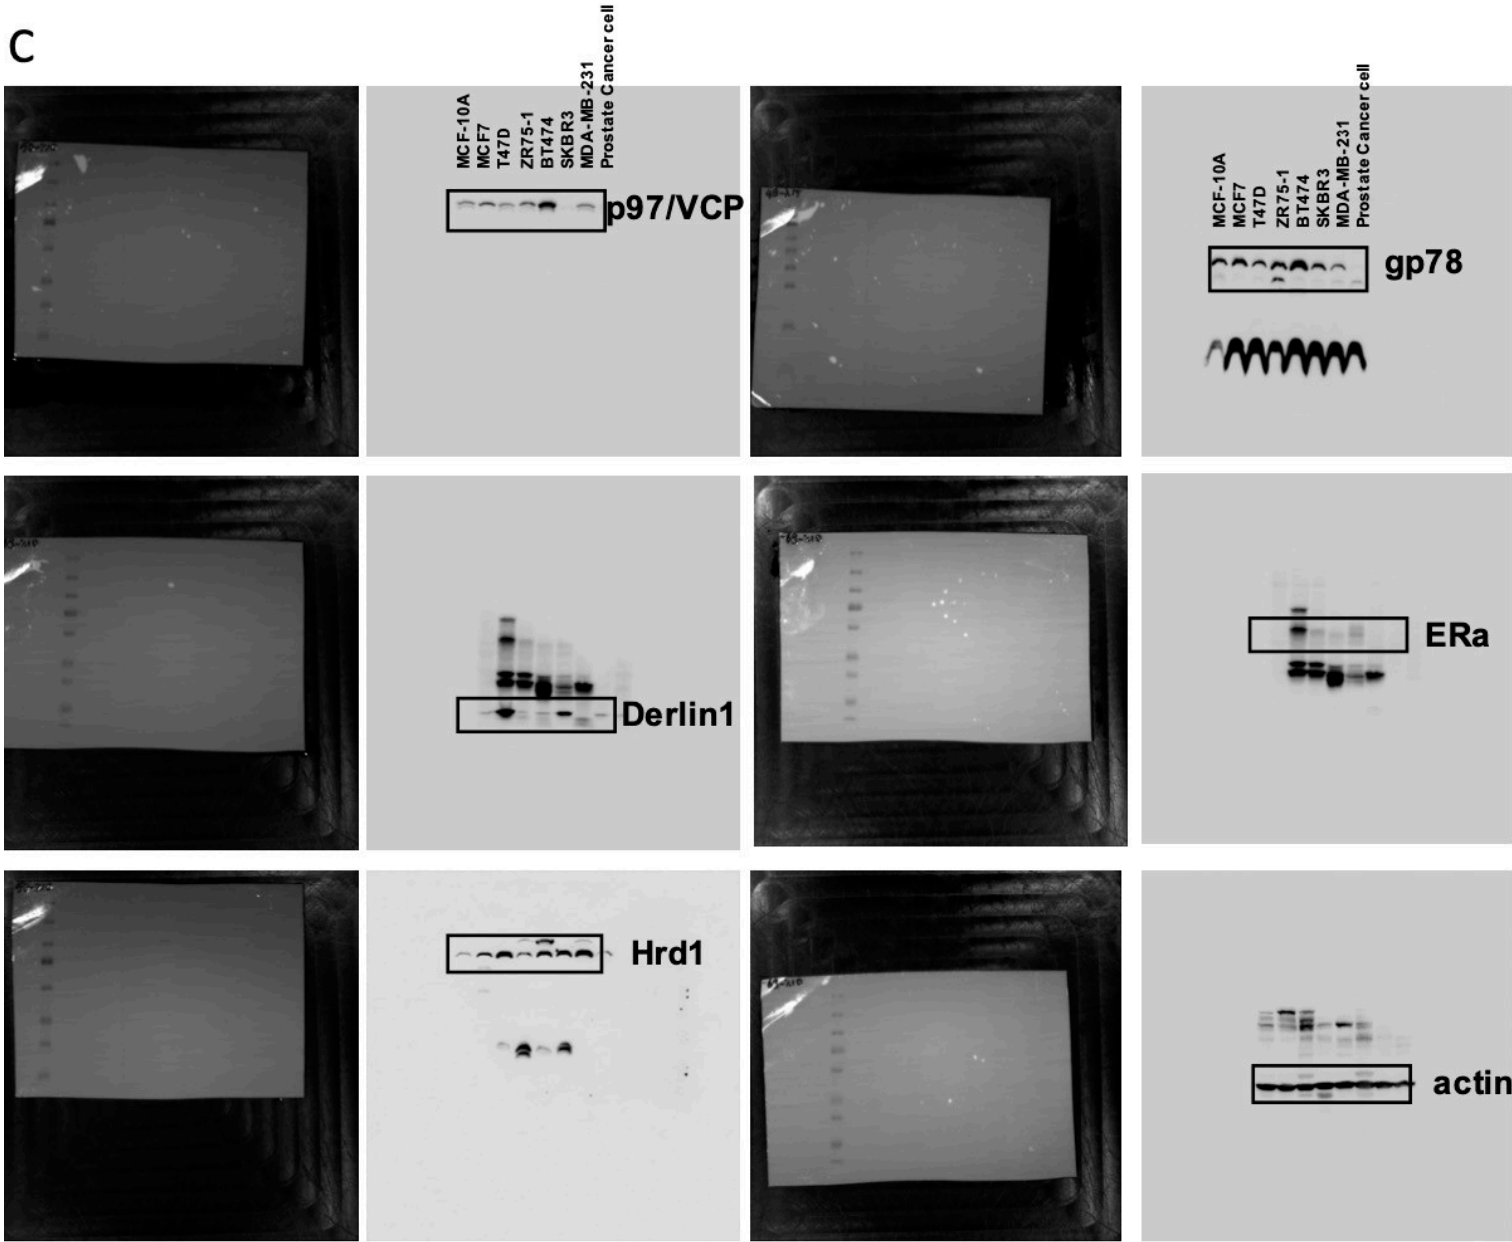

D

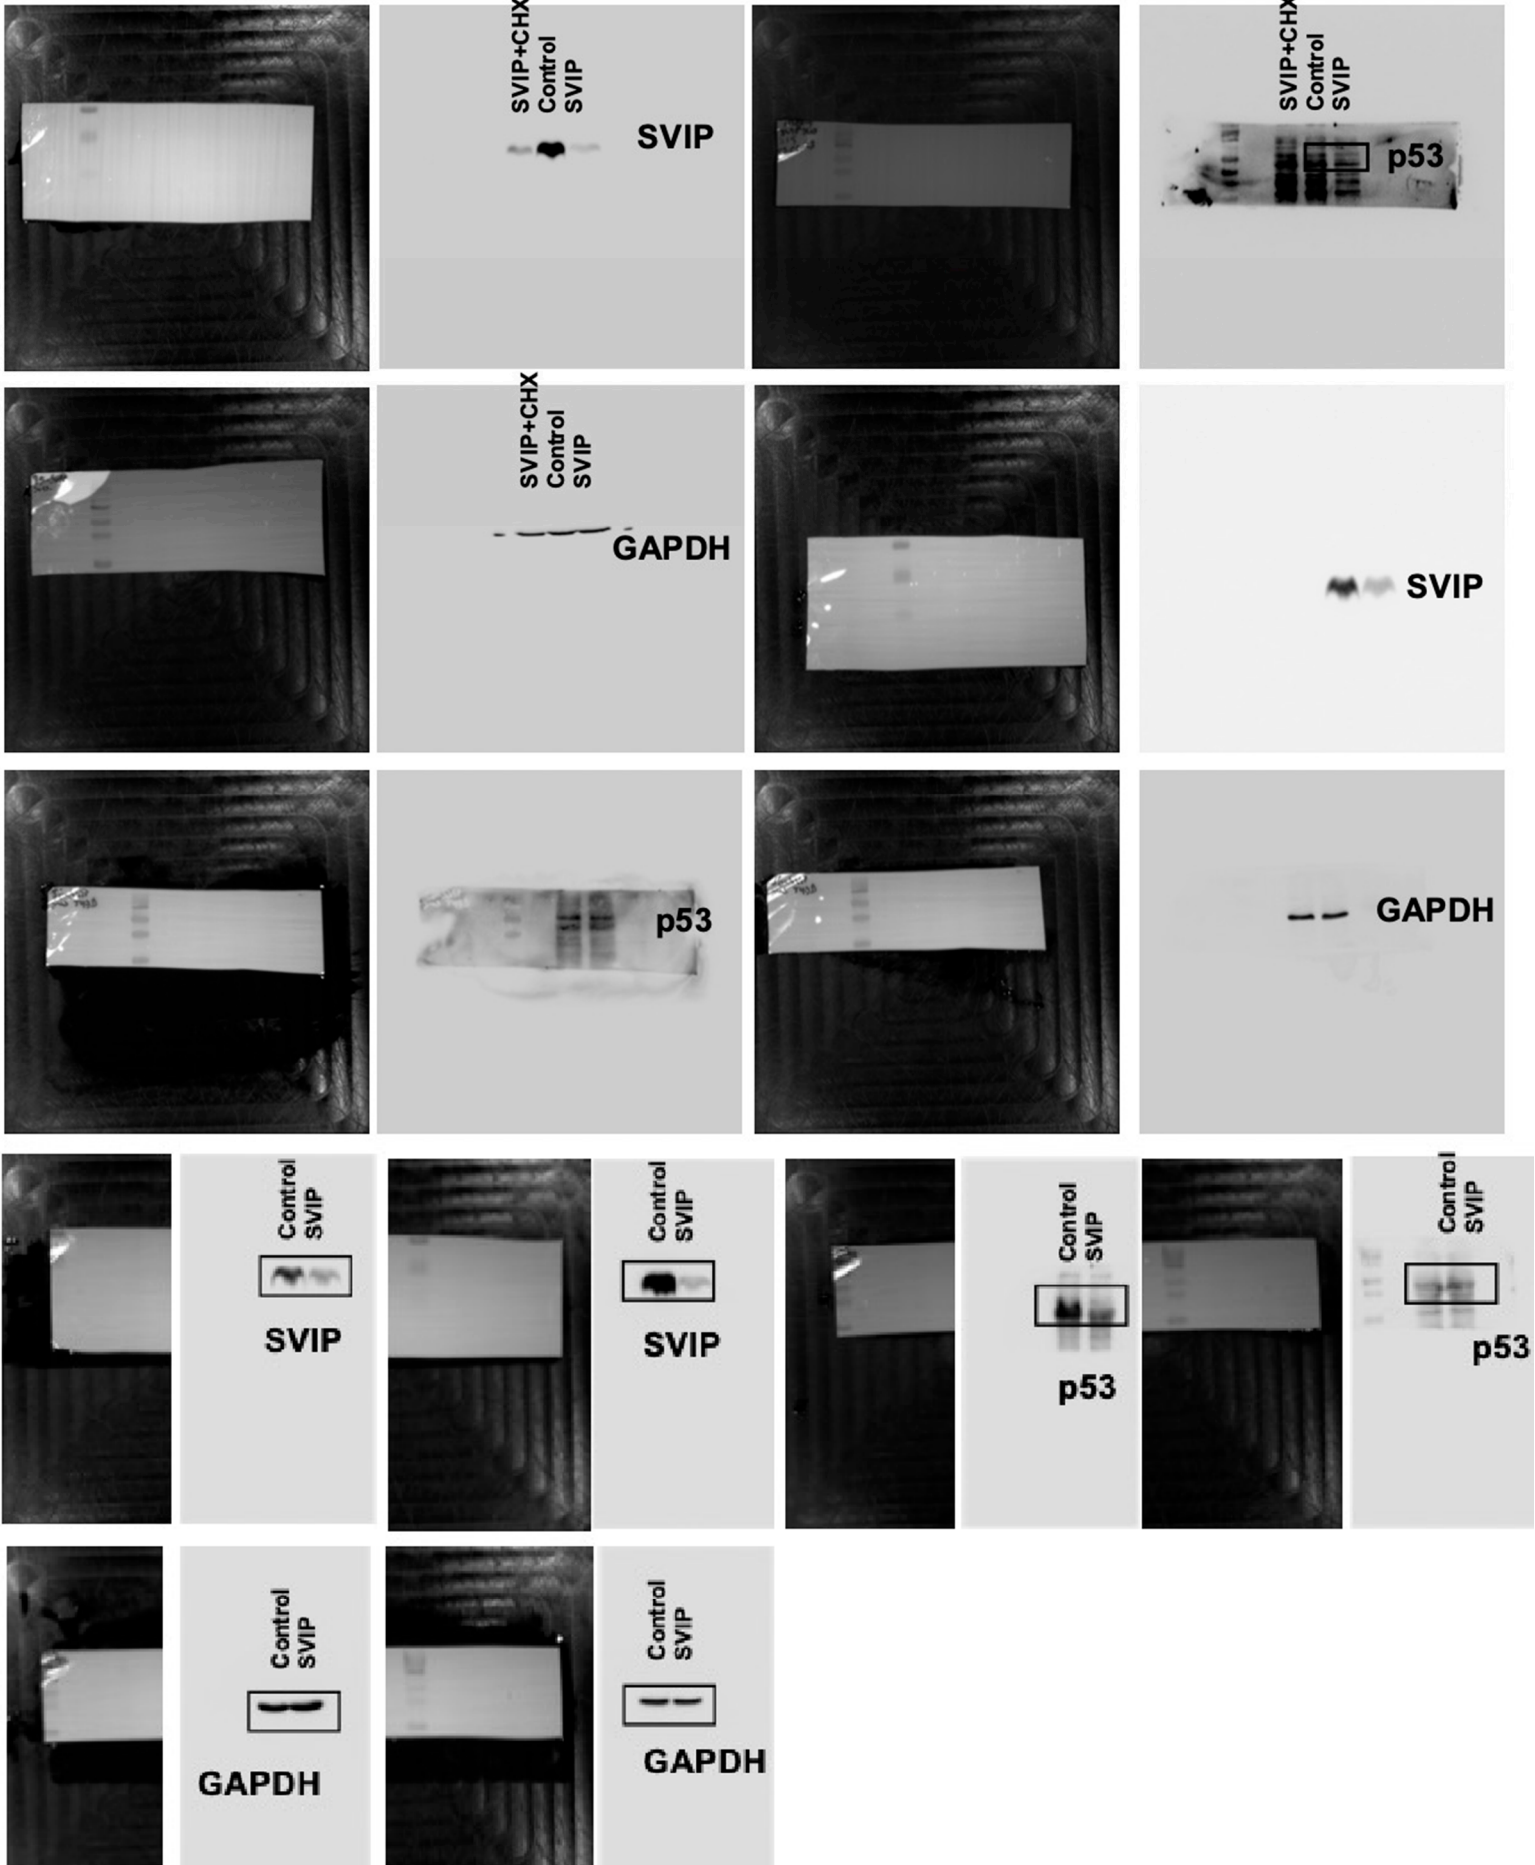

E

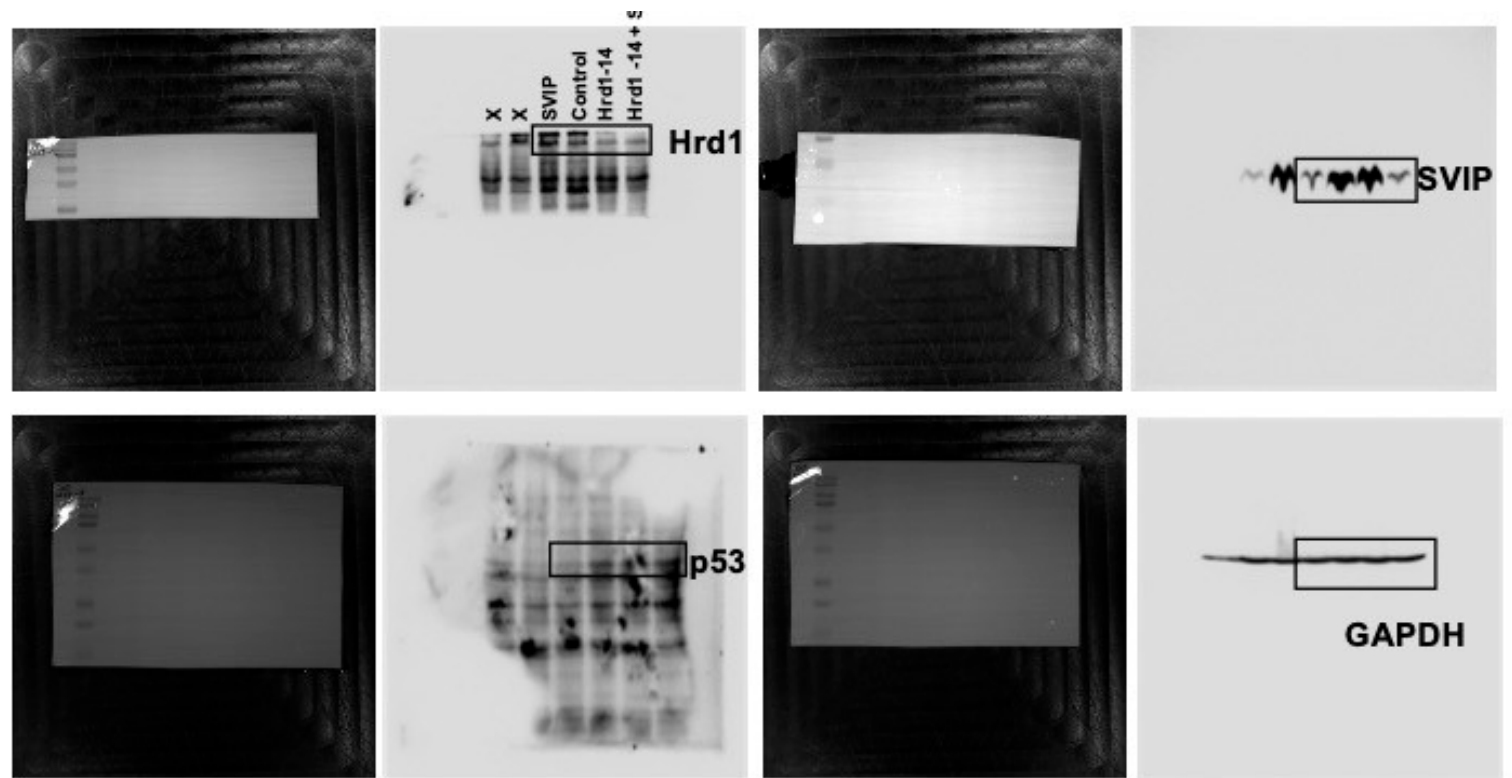

**Supplementary Fig. S1.** SVIP expression in breast cancer different subtypes and normal tissues (GEPIA). In the SVIP expression levels analysis using GEPIA, the threshold included expression fold change ( $\text{Log}_2\text{FC}$ )  $\geq 1$  between breast cancer subtype and normal tissues, \*  $p < 0.01$ . T = tumor tissues. N = normal tissues, NUM: number.

**Supplementary Fig. S2.** Correlation of SVIP mRNA expression and methylation (cBioPortal). (Spearman=-0.19,  $p=8.81\text{e-}7$ ; Pearson=-0.10,  $p=0.0128$ )

**Supplementary Fig. S3.** UALCAN, GEPIA, and bc-GenExMiner v4.8 portals analysis of breast cancer samples from the TCGA and GTEx datasets **A)** The mRNA expression level of SVIP in breast cancer patients with ER (-) and ER (+) (\*\*\*\*,  $p < 0.0001$ ) (bc-GenExMiner software). **B)** The mRNA expression level of SVIP in breast cancer patients with PR (-) and PR (+) (\*\*\*\*,  $p < 0.0001$ ) (bc-GenExMiner software). **C)** The mRNA expression level of SVIP in breast cancer patients with HER2 (-) and HER2 (+) (\*\*\*,  $p = 0.0004$ ) (bc-GenExMiner software). **D)** The mRNA expression level of SVIP in breast cancer patients with p53 wild type and p53 mutated (\*\*\*\*,  $p < 0.0001$ ) (bc-GenExMiner software). IHC: Immunohistochemistry

**Supplementary Fig. S4.** Original Blots of immunoblotting experiments
